# Supplementary material
Source: PubMed Central journal article supplement (PMC4347350)
Supplement: SD8.pdf [file SD8.pdf]

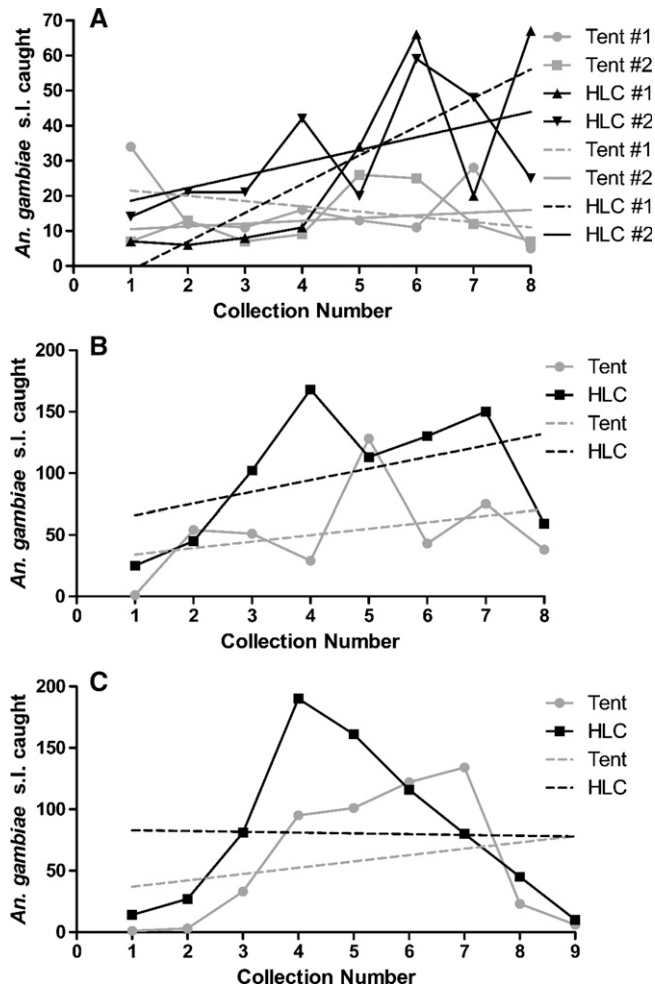

SUPPLEMENTAL FIGURE 1. Bolahun, Liberia (A); Bougouriba, Burkina Faso (B); and Diarkadougou, Burkina Faso (C) nightly catch numbers with Infocitex tent (IST) or human landing catch (HLC) approaches. Dashed lines are linear regressions of each trapping method in that location. Slopes of tent and HLC regressions differed significantly in Bolahun (analysis of covariance,  $P = 0.0043$ ), but not in Bougouriba ( $P = 0.6702$ ) or Diarkadougou ( $P = 0.6229$ ). Slopes of the regression lines are as follows: **Fig A:** Tent 1:  $-0.5625$ , Tent 2:  $0.2946$ , HLC 1:  $4.0893$ , HLC 2:  $1.8095$ ; **Fig B:** Tent:  $6.1786$ , HLC:  $5.7143$ ; **Fig C:** Tent:  $3.25$ , HLC:  $-3.7262$ .
